# Supplementary material
Source: PubMed Central journal article supplement (PMC2659264)

## Supplemental Data

Fig. S1: Alignment of annelid ERs with mollusk and human ERs. Only the DBD and LBD are included. A mutation in the activation function surface AF-2 that disrupts coactivators recruitment and transcriptional activation is boxed.

|               | <b>DBD</b>                                                     |
|---------------|----------------------------------------------------------------|
| platynereisER | CQICSDLASGFHYGVWSCEGCKAFFKRSIQ----GPVDYVCPATNNCTIDKHRRKSCQAC   |
| capitellaER   | CQICDDAASGFHYGVWSCEGCKAFFKRSIQAMSSGPVDYVCPATQNCCTIDRQRRKSCQAC  |
| octopusER     | CQVCCDNASGFHYGVWSCEGCKAFFKRSIQ----GPVDYVCPATNSCTIDKHRRKSCQAC   |
| aplysiaER     | CQVCSDNASGFHYGVWSCEGCKAFFKRSIQ----GPVDYICPATNTCTIDKHRRKSCQAC   |
| humanERa      | CAVCNDYASGYHYGVWSCEGCKAFFKRSIQ----GHNDYMCPATNQCTIDKNRRKSCQAC   |
| platynereisER | RFRKCLEVGMKRRRERRTTKKVKSPGSPEEKITKKVTRTPNTKPNPKEKGGPPVENNGQSRR |
| capitellaER   | RLNKCIQMGMSRGNCRRERERPGK-----ANRKKKGDDAQTSPP-----              |
| octopusER     | RLRKCYEVGMNKGSRKERKNSN----QTKVKRSSAD-----                      |
| aplysiaER     | RLRRCYEVGMNKGSRKEKRNNGN--TSSLKGGKRCRAD-----                    |
| humanERa      | RLRKCYEVGMNKGKIRKDRRGGRM-----LKHKRQRDDGEGR-----                |
| platynereisER | VLQLEETVAVESVKTEAVSPQECSPSGHTSQEDLSVPMTSASQSFNLTPPPSTSSSTSSP   |
| capitellaER   | ----KVRIKEEKDGNRSPVAGSSSTAAAAAATAAVVATPPPAPQAPPAAASNEPVP       |
| octopusER     | -----FSDSTVNSTSGN-----QPAKSQRLSK                               |
| aplysiaER     | -----SSDSAVNSTNNG-----ASSKSSKRSR                               |
| humanERa      | -----GEVGSAGDMRAANLWPSPLMIKRSKKNLALSLT                         |
|               | <b>LBD</b>                                                     |
| platynereisER | SNGTSSLQIDASTFKIDPGLPLDPPHPLVVILEENDLPPKICKEPLTAESEETEYSLLHR   |
| capitellaER   | IH-----TLVAHLMRVDPP--VRHANHDHSLPDTWENLTAS                      |
| octopusER     | SS-----SLVEELSKNDFA--VPECKLNPSIPLTKNYILQL                      |
| aplysiaER     | SA-----SILEALQKADLP--VMDSYHNHNLPATRVHLLNT                      |
| humanERa      | AD-----QMVSAALLDAEPP--ILYSEYDPTPRPFSEASMMGL                    |
| platynereisER | LIGLADMELVDVVNWAKVLPGFSGLELRDRIAILESCWMELLCIGAAGRSR-LNTTFQVN   |
| capitellaER   | LFKLADFELMDVITWAKNIPGYSALSLKLRIHLLLEACWMEVLIIGLLWRSQ-NHKD-CLM  |
| octopusER     | LIQVADKDLVQLINWAKHIPGYADLSLSDQVHLIECCWMELVLLNCAAYRSM-EYEGKRLA  |
| aplysiaER     | LIKLADRELVYLINWAKHVPGYTCLTLGDQVHLIECCWMELLLLNCAYRSM-EHEGRTL    |
| humanERa      | LTNLADRELVHMINWAKRVPGFVLDLTLHDQVHLLLECAWLEILMIGLVWRSM-EHPG-KLL |
| platynereisER | FAENLHFN-EETAKKAKMSSIVGEIWIQISQFRYLELSNHEFMLLRVVTMLNA-----     |
| capitellaER   | FAPDLEFD-RTRIRIAELESISTPILRLSQLFTRLHVTREEMVLLRVLALINS-----D    |
| octopusER     | FASNLILE-KHHWEILGMTQILEQVAAVSEQLLQFGINREELLLLLEATILVNA-----    |
| aplysiaER     | FAPDFHLE-RQQWALTMGMDVLEQVSAVSEQMLLHGLNKEELLLLQATVLVNA-----     |
| humanERa      | FAPNLLLDRNQKCVVEGMVEIFDMLLATSSRFMMNLQGEFVCLKSIILLNSGVYTFLS     |
| platynereisER | -ESIRLSCLDAMHKIRQOYLEALHFECGRTLGKISESSCVRMAQILCILPFARQVSLKAI   |
| capitellaER   | ICGDNDEERSLQEDLQOSVHEAFEYTVIRRQIQ----PLSRLNLLSLLPHVRMAAML      |
| octopusER     | -EVRRLAGFSKIDDIRIQIILNALIDTAQKYHPD----NPRHVPSALLLSHVRQASDRSI   |
| aplysiaER     | -EVRLDSFLKIQEMRQLILDVFMEVAGRHOQFGF---NWRHAPSILLLLTHIRQAGERGI   |
| humanERa      | STLKSLEEKDHIHRVLDKITDTLTIHLMKAGLTLQ-QQHQLAQLLLILSHIRHMSNKG     |
| platynereisER | THLFGNMHNQHAVPVGDLVAEMLVAQKELMTNEDSAKIIT-----                  |
| capitellaER   | QQISEIKSSLRLPLEDLLNEMMEGSTKASRTMTP-----                        |
| octopusER     | IYLQKQKDEGHVTFCELITEMLEAQNSENDIVAPRADVIGMT-----                |
| aplysiaER     | TYFQKLKMEGCVTFCDLLTEMLDAHNSGERRRLQOQQOQOQOQSHAHHHHPPPLPHHH     |
| humanERa      | EHLYSMKCKNVVPLYDLLLEMLDAHRLHAPTSRGGASVEETDQSHLATAGSTSSHSLQKY   |

Fig. S2: Complete steroid receptor phylogeny inferred using Bayesian MCMC. Node labels show inferred posterior probabilities for each clade.

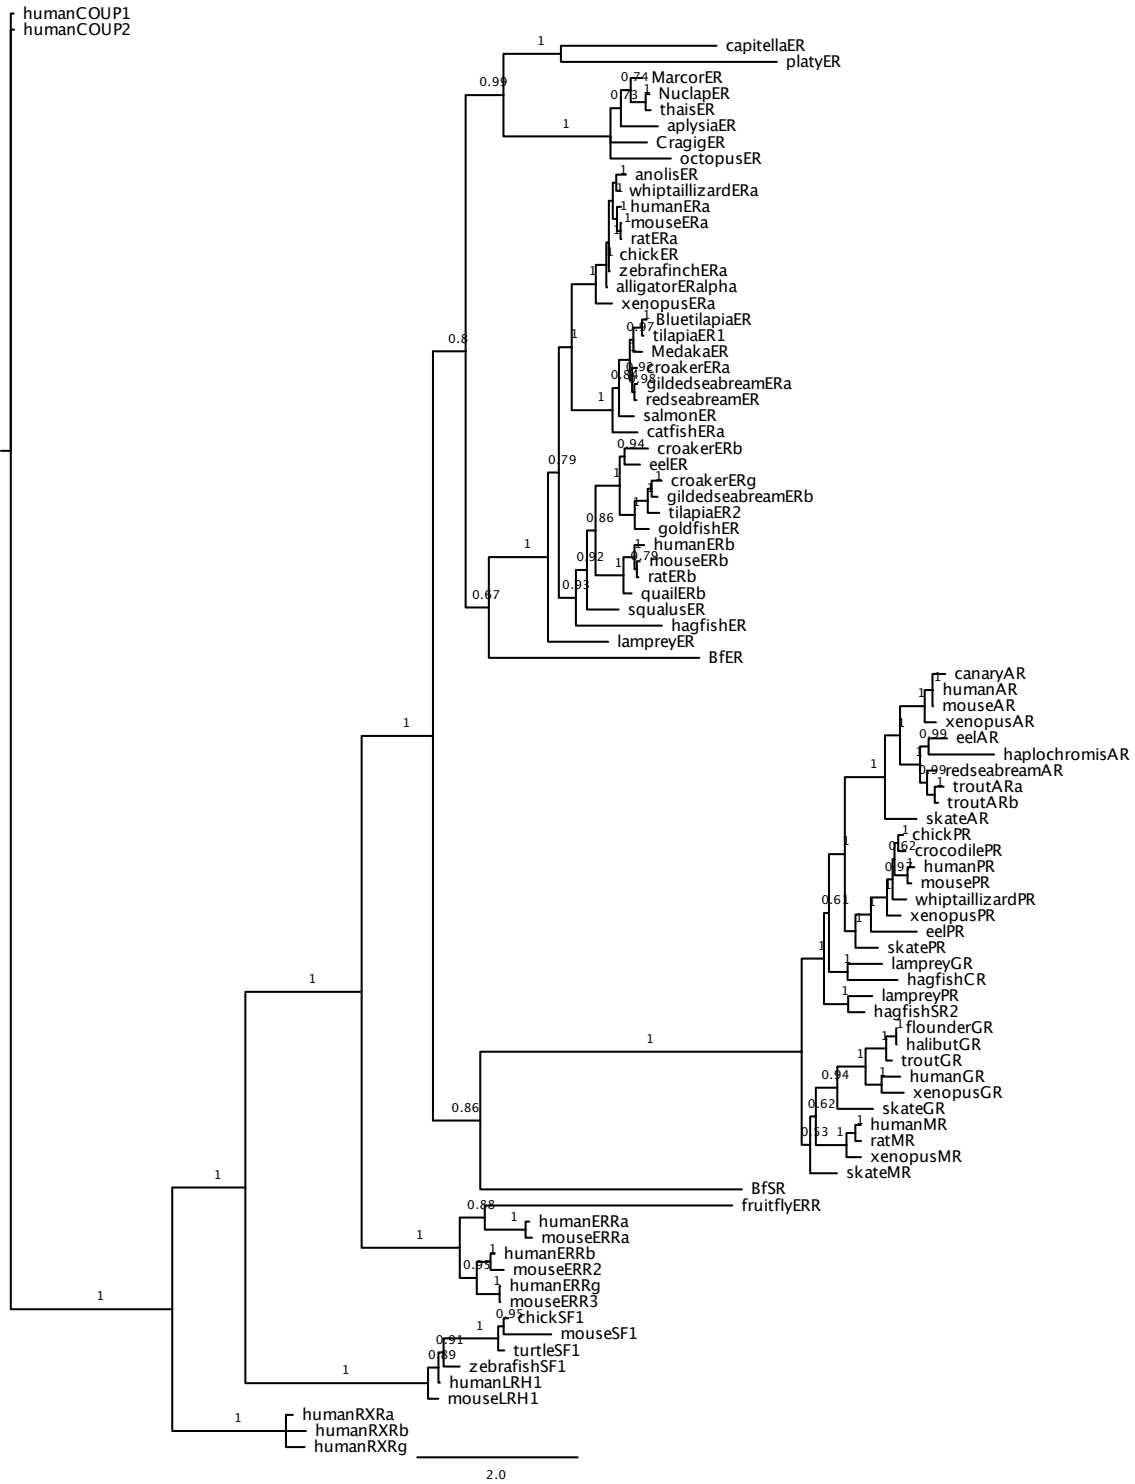

Fig. S3: Steroid receptor phylogeny inferred using maximum likelihood, with likelihood ratio statistics. Node labels show approximate likelihood ratio statistics ( $LRS = 2\ln(\text{likelihood ratio})$ ). The likelihood ratio compares the likelihood of the maximum likelihood phylogeny to the likelihood of the highest-likelihood phylogeny missing the node of interest.

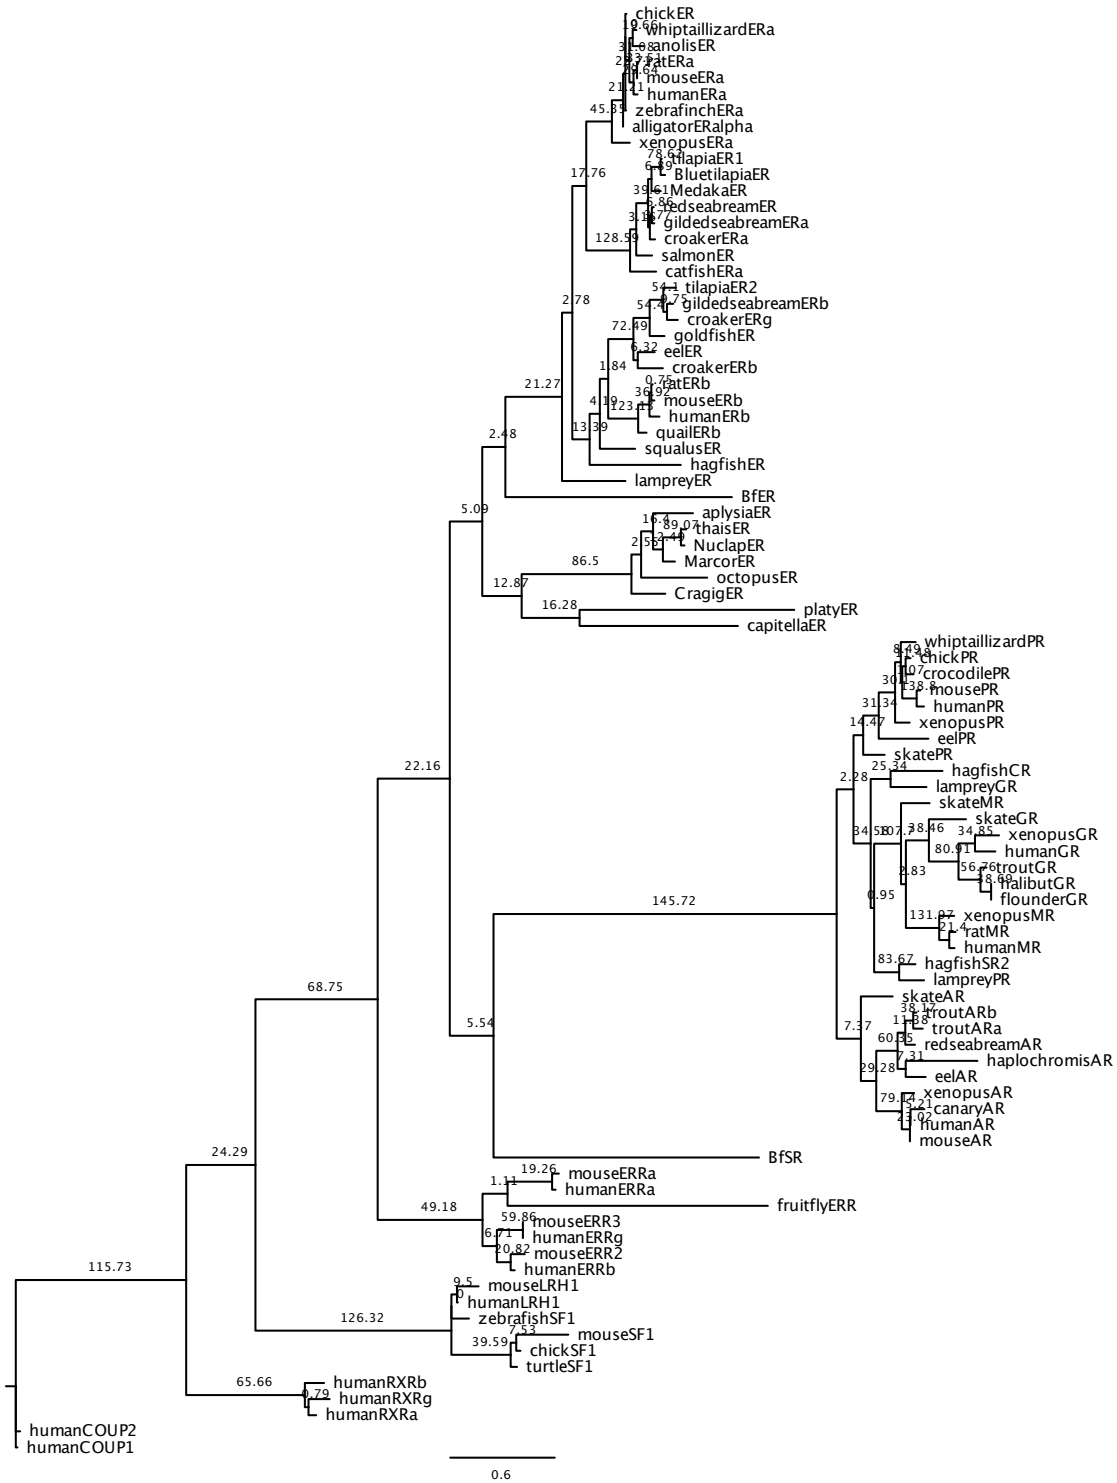

Fig. S4: Steroid receptor phylogeny inferred using maximum likelihood, with chi-square support statistics. Chi-square statistics represent 1 minus the probability that the likelihood ratio statistic observed for each node would have occurred by chance if the node is in fact false.

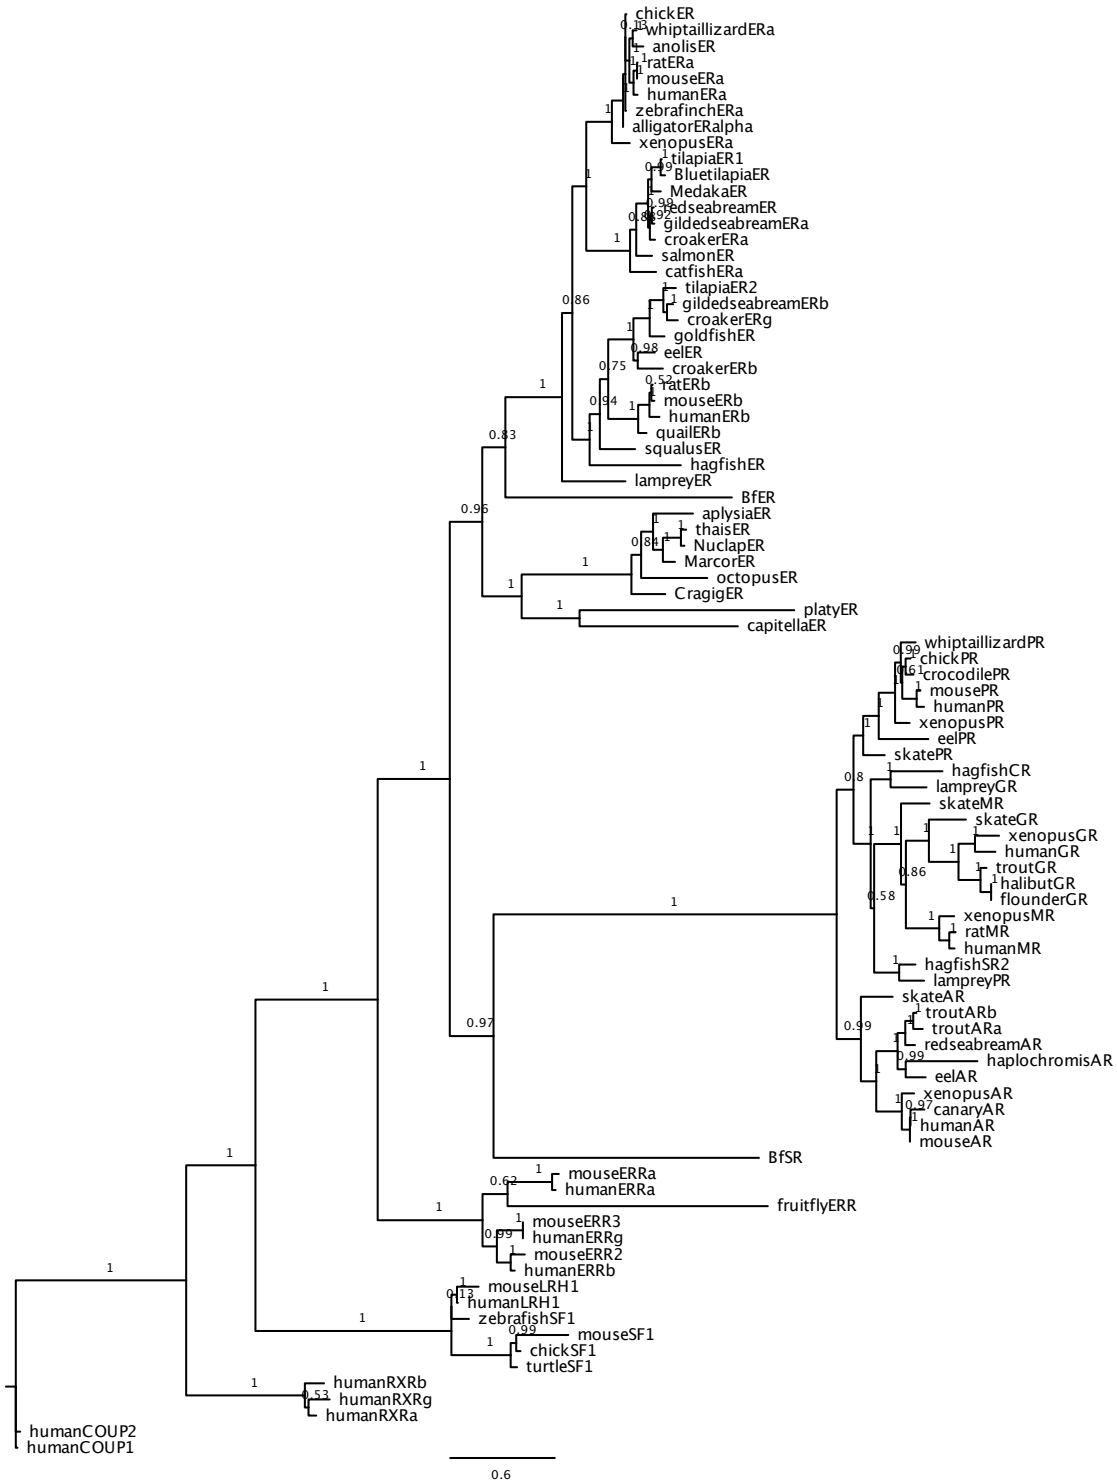

Fig. S5: Steroid receptor phylogeny excluding cephalochordate receptors. Maximum likelihood topology for the same alignment in Figs. S2-S4 but with ER and SR from *Branchiostoma floridae* excluded. Node labels show approximate likelihood ratio, the chi-square statistic for the approximate likelihood ratio, and the Bayesian posterior probability.

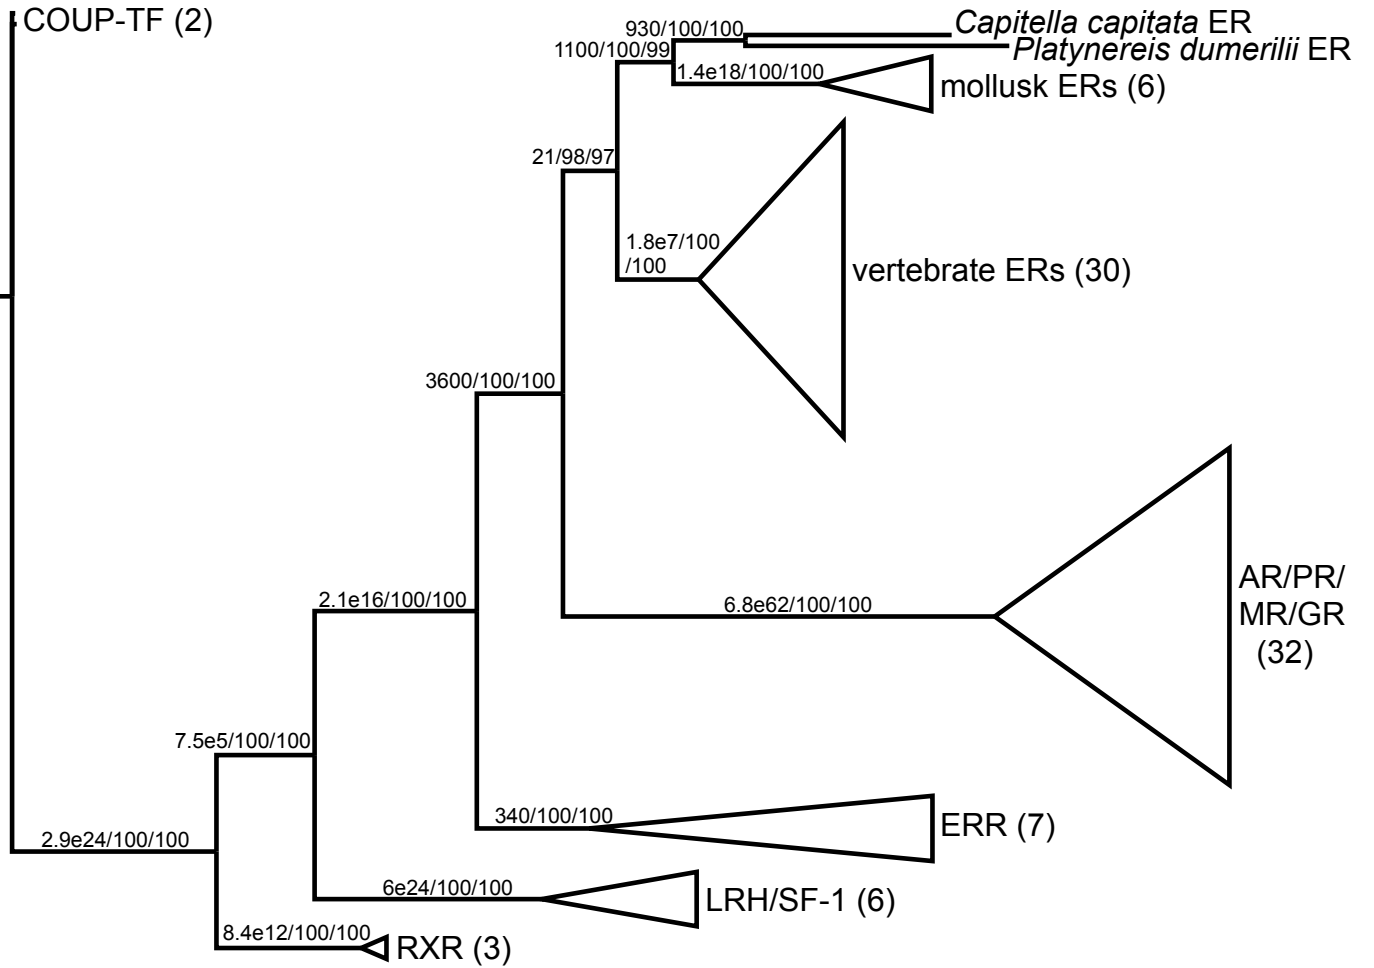

Fig. S6: Hormone and xenobiotic sensitivity of full-length PdER and human ER. Fold-activation of an ERE-driven luciferase reporter over vector-only control by full-length receptors is shown. DES, diethylstilbestrol; 4-OP, 4-octylphenol; BPA, Bisphenol A.

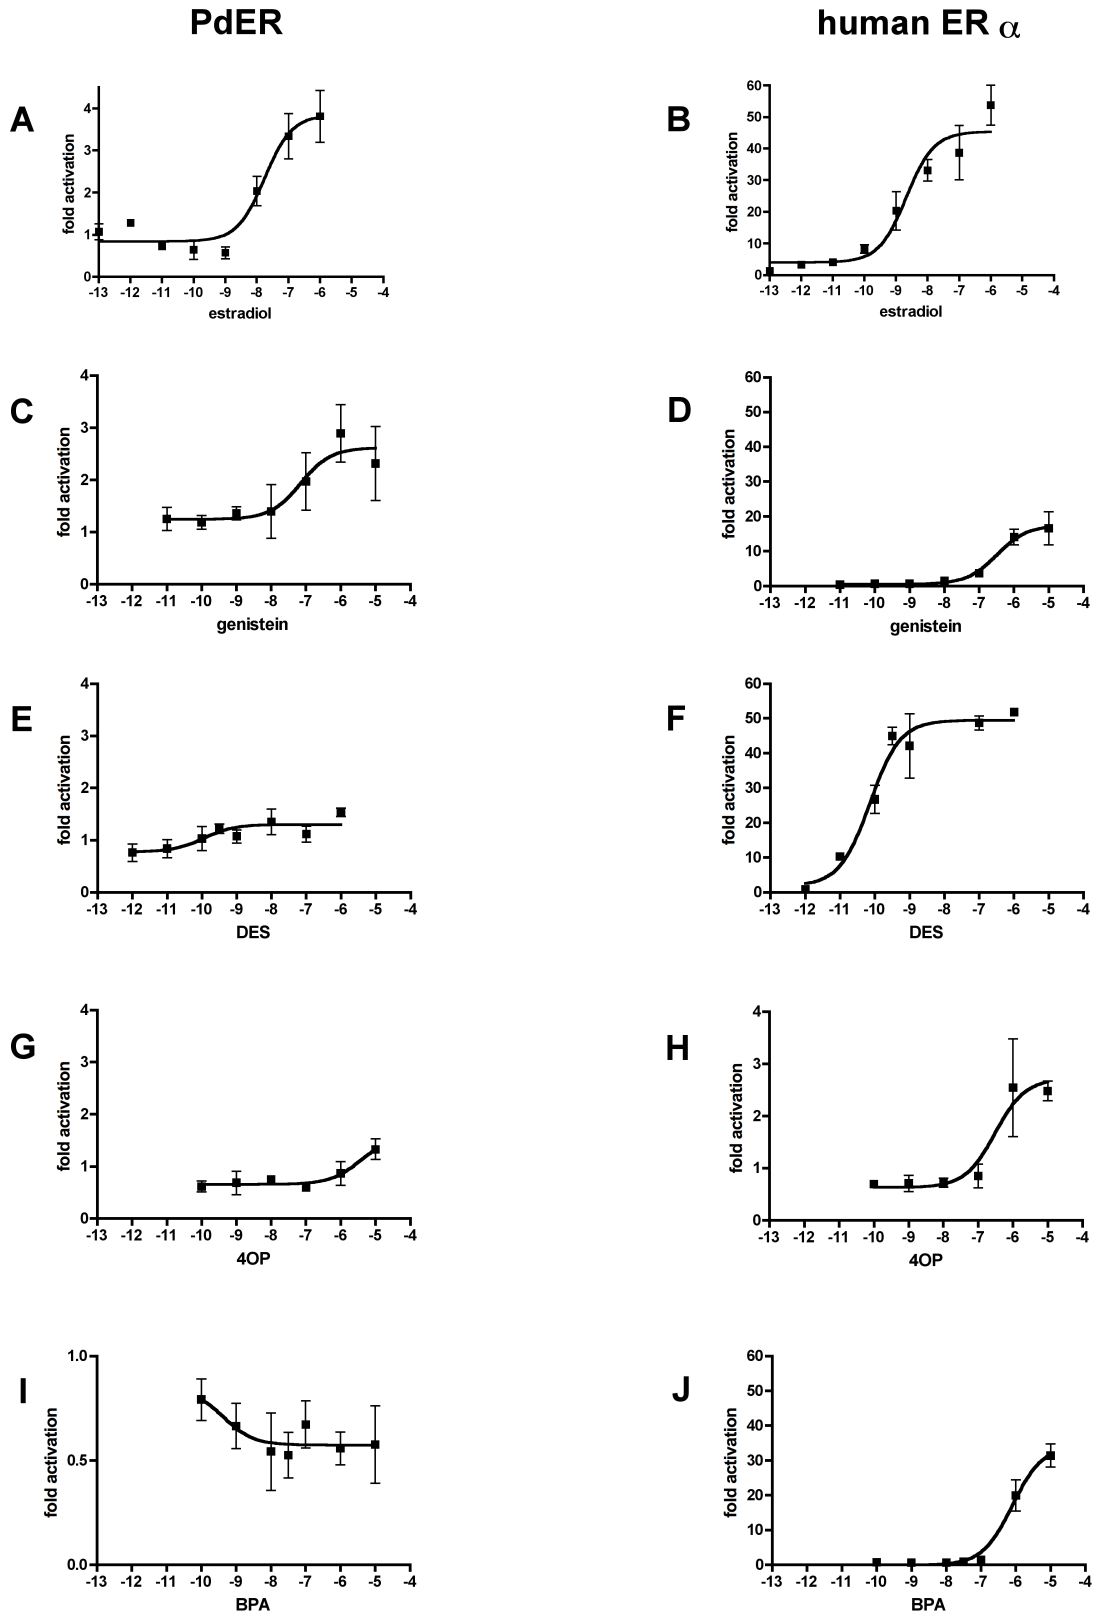

Fig. S7: Estrogen-specificity of CcER. Fold activation of a luciferase reporter (relative to vehicle-only control) by a Gal4DBD-CcERLBD fusion protein is shown in the presence of various hormones, each at 1 M.

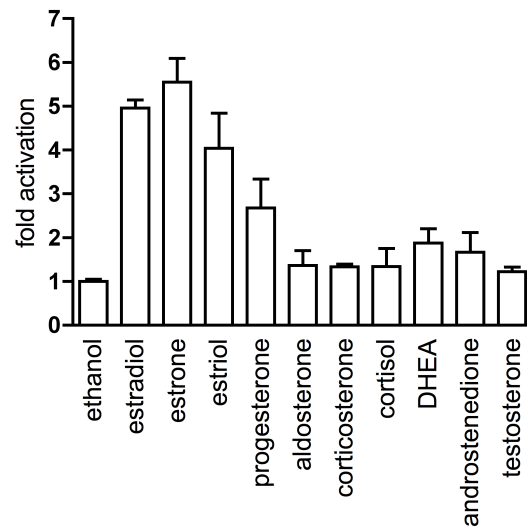

Supplement: en.2008-1338_1.pdf [file en.2008-1338_1.pdf]
