# Supplementary material
Source: PubMed Central journal article supplement (PMC2659264)
Supplement: en.2008-1338_2.pdf [file en.2008-1338_2.pdf]

|     |     |       |       |   |   |   |   |   |   |   |   |   |
|-----|-----|-------|-------|---|---|---|---|---|---|---|---|---|
| 98  | -   | -     | -     | - | - | - | - | - | - | - | - | - |
| 99  | R   | 0.884 | .     | . | . | 1 | 1 | 1 | 1 | 1 | 1 | 1 |
| 100 | D   | 0.428 | N     | E | . | 0 | 1 | 1 | 0 | 0 | 0 | 0 |
| 101 | Q   | 0.469 | .     | . | E | 1 | 0 | 1 | 1 | 0 | 1 | 1 |
| 102 | S   | 0.649 | G     | G | G | 0 | 0 | 0 | 1 | 1 | 1 | 1 |
| 103 | K   | 0.551 | .     | R | . | 1 | 1 | 1 | 0 | 0 | 0 | 0 |
| 104 | C   | 0.719 | .     | . | . | 1 | 1 | 1 | 1 | 1 | 1 | 1 |
| 105 | V   | 0.609 | .     | . | . | 1 | 1 | 1 | 1 | 1 | 1 | 1 |
| 106 | A   | 0.931 | E     | . | E | 0 | 0 | 0 | 0 | 0 | 0 | 0 |
| 107 | G   | 1     | .     | . | . | 1 | 1 | 1 | 1 | 1 | 1 | 1 |
| 108 | -   | -     | -     | - | - | - | - | - | - | - | - | - |
| 109 | -   | -     | -     | - | - | - | - | - | - | - | - | - |
| 110 | -   | -     | -     | - | - | - | - | - | - | - | - | - |
| 111 | -   | -     | -     | - | - | - | - | - | - | - | - | - |
| 12  | 112 | M     | 0.905 | . | I | 1 | 0 | 1 | 1 | 0 | 1 | 1 |
| 113 | L   | 0.179 | V     | . | . | 0 | 1 | 1 | 0 | 1 | 1 | 1 |
| 114 | E   | 0.756 | .     | . | . | 1 | 1 | 1 | 1 | 1 | 1 | 1 |
| 13  | 115 | I     | 0.968 | . | L | 1 | 1 | 1 | 0 | 0 | 0 | 0 |
| 14  | 116 | F     | 0.53  | . | . | 1 | 1 | 1 | 1 | 1 | 1 | 1 |
| 117 | D   | 0.498 | .     | . | . | 1 | 1 | 1 | 1 | 1 | 1 | 1 |
| 118 | Q   | 0.736 | M     | . | M | 0 | 0 | 0 | 0 | 0 | 0 | 0 |
| 15  | 119 | I     | 0.925 | L | L | 0 | 0 | 0 | 1 | 1 | 1 | 1 |
| 120 | L   | 0.934 | .     | . | . | 1 | 1 | 1 | 1 | 1 | 1 | 1 |
| 121 | -   | -     | -     | - | - | - | - | - | - | - | - | - |
| 122 | -   | -     | -     | - | - | - | - | - | - | - | - | - |
| 123 | -   | -     | -     | - | - | - | - | - | - | - | - | - |
| 124 | -   | -     | -     | - | - | - | - | - | - | - | - | - |
| 125 | -   | -     | -     | - | - | - | - | - | - | - | - | - |
| 126 | -   | -     | -     | - | - | - | - | - | - | - | - | - |
| 127 | -   | -     | -     | - | - | - | - | - | - | - | - | - |
| 128 | -   | -     | -     | - | - | - | - | - | - | - | - | - |
| 129 | -   | -     | -     | - | - | - | - | - | - | - | - | - |
| 130 | Q   | 0.265 | A     | . | A | 0 | 0 | 0 | 0 | 0 | 0 | 0 |
| 131 | I   | 0.574 | T     | . | T | 0 | 0 | 0 | 0 | 0 | 0 | 0 |
| 132 | A   | 0.769 | S     | V | T | 0 | 0 | 0 | 0 | 0 | 0 | 0 |
| 133 | Q   | 0.371 | S     | R | S | 0 | 0 | 0 | 0 | 0 | 0 | 0 |
| 134 | Q   | 0.532 | R     | R | R | 0 | 0 | 0 | 1 | 1 | 1 | 1 |
| 135 | F   | 0.997 | .     | . | . | 1 | 1 | 1 | 1 | 1 | 1 | 1 |
| 136 | R   | 0.472 | .     | . | . | 1 | 1 | 1 | 1 | 1 | 1 | 1 |
| 137 | E   | 0.664 | M     | . | . | 0 | 1 | 1 | 0 | 1 | 1 | 1 |
| 138 | L   | 0.993 | M     | . | . | 0 | 1 | 1 | 0 | 1 | 1 | 1 |
| 139 | Q   | 0.623 | N     | K | K | 0 | 0 | 0 | 0 | 1 | 1 | 1 |
| 140 | V   | 0.662 | L     | L | L | 0 | 0 | 0 | 1 | 1 | 1 | 1 |
| 141 | Q   | 0.534 | .     | E | . | 1 | 1 | 1 | 0 | 0 | 0 | 0 |
| 142 | K   | 0.506 | G     | R | H | 0 | 0 | 0 | 0 | 0 | 0 | 0 |
| 143 | E   | 0.96  | .     | . | K | 1 | 0 | 1 | 1 | 0 | 1 | 1 |
| 144 | E   | 1     | .     | . | . | 1 | 1 | 1 | 1 | 1 | 1 | 1 |
| 145 | F   | 0.698 | .     | . | Y | 1 | 0 | 1 | 1 | 0 | 1 | 1 |
| 146 | V   | 0.948 | .     | . | L | 1 | 0 | 1 | 1 | 0 | 1 | 1 |
| 147 | C   | 0.999 | .     | . | . | 1 | 1 | 1 | 1 | 1 | 1 | 1 |
| 148 | L   | 1     | .     | . | V | 1 | 0 | 1 | 1 | 0 | 1 | 1 |
| 149 | K   | 0.998 | .     | . | . | 1 | 1 | 1 | 1 | 1 | 1 | 1 |
| 150 | A   | 0.999 | S     | . | . | 0 | 1 | 1 | 0 | 1 | 1 | 1 |
| 151 | I   | 0.641 | .     | L | M | 1 | 0 | 1 | 0 | 0 | 0 | 0 |
| 152 | T   | 0.343 | I     | V | I | 0 | 0 | 0 | 0 | 0 | 0 | 0 |
| 153 | L   | 1     | .     | . | . | 1 | 1 | 1 | 1 | 1 | 1 | 1 |
| 154 | L   | 0.799 | .     | . | . | 1 | 1 | 1 | 1 | 1 | 1 | 1 |
| 155 | N   | 0.997 | .     | . | . | 1 | 1 | 1 | 1 | 1 | 1 | 1 |
| 156 | A   | 0.75  | S     | S | S | 0 | 0 | 0 | 1 | 1 | 1 | 1 |
| 157 | S   | 0.342 | G     | D | . | 0 | 1 | 1 | 0 | 0 | 0 | 0 |
| 158 | V   | 0.203 | .     | . | M | 1 | 0 | 1 | 1 | 0 | 1 | 1 |
| 159 | -   | -     | -     | - | - | - | - | - | - | - | - | - |
| 160 | -   | -     | -     | - | - | - | - | - | - | - | - | - |
| 161 | F   | 0.331 | Y     | L | Y | 0 | 0 | 0 | 0 | 0 | 0 | 0 |
| 162 | T   | 0.297 | .     | P | P | 1 | 0 | 1 | 0 | 0 | 0 | 0 |
| 163 | S   | 0.203 | F     | F | P | 0 | 0 | 0 | 1 | 0 | 1 | 1 |
| 164 | S   | 0.271 | .     | . | . | 1 | 1 | 1 | 1 | 1 | 1 | 1 |
| 165 | L   | 0.418 | .     | . | V | 1 | 0 | 1 | 1 | 0 | 1 | 1 |
| 166 | A   | 0.328 | S     | D | T | 0 | 0 | 0 | 0 | 0 | 0 | 0 |
| 167 | D   | 0.307 | T     | T | A | 0 | 0 | 0 | 1 | 0 | 1 | 1 |
| 168 | A   | 0.399 | L     | L | T | 0 | 0 | 0 | 1 | 0 | 1 | 1 |
| 169 | E   | 0.514 | K     | . | Q | 0 | 0 | 0 | 0 | 0 | 0 | 0 |
| 170 | R   | 0.509 | S     | E | D | 0 | 0 | 0 | 0 | 0 | 0 | 0 |
| 171 | L   | 0.975 | .     | . | A | 1 | 0 | 1 | 1 | 0 | 1 | 1 |
| 172 | E   | 0.967 | .     | . | D | 1 | 0 | 1 | 1 | 0 | 1 | 1 |
| 173 | N   | 0.392 | E     | . | S | 0 | 0 | 0 | 0 | 0 | 0 | 0 |
| 174 | H   | 0.507 | K     | L | S | 0 | 0 | 0 | 0 | 0 | 0 | 0 |
| 175 | D   | 0.24  | .     | E | R | 1 | 0 | 1 | 0 | 0 | 0 | 0 |
| 176 | K   | 0.437 | H     | L | . | 0 | 1 | 1 | 0 | 0 | 0 | 0 |
| 177 | V   | 0.879 | I     | I | L | 0 | 0 | 0 | 1 | 0 | 1 | 1 |
| 178 | Q   | 0.872 | H     | . | A | 0 | 0 | 0 | 0 | 0 | 0 | 0 |
| 179 | K   | 0.323 | R     | . | H | 0 | 0 | 0 | 0 | 0 | 0 | 0 |
| 180 | L   | 0.932 | V     | M | . | 0 | 1 | 1 | 0 | 0 | 0 | 0 |
| 181 | Q   | 0.998 | L     | R | L | 0 | 0 | 0 | 0 | 0 | 0 | 0 |
| 182 | D   | 0.556 | .     | . | N | 1 | 0 | 1 | 1 | 0 | 1 | 1 |
| 183 | A   | 0.202 | K     | K | . | 0 | 1 | 1 | 1 | 0 | 1 | 1 |
| 184 | I   | 0.682 | .     | . | V | 1 | 0 | 1 | 1 | 0 | 1 | 1 |
| 185 | H   | 0.476 | T     | T | T | 0 | 0 | 0 | 1 | 1 | 1 | 1 |
| 186 | A   | 0.815 | .     | . | . | 1 | 1 | 1 | 1 | 1 | 1 | 1 |
| 187 | D   | 1     | T     | . | . | 0 | 1 | 1 | 0 | 1 | 1 | 1 |
| 188 | L   | 1     | .     | . | . | 1 | 1 | 1 | 1 | 1 | 1 | 1 |
| 189 | V   | 0.389 | I     | . | . | 0 | 1 | 1 | 0 | 1 | 1 | 1 |
| 190 | D   | 0.711 | H     | . | W | 0 | 0 | 0 | 0 | 0 | 0 | 0 |
| 191 | T   | 0.318 | L     | Y | V | 0 | 0 | 0 | 0 | 0 | 0 | 0 |
| 192 | V   | 0.363 | M     | I | I | 0 | 0 | 0 | 0 | 1 | 1 | 1 |
| 193 | A   | 0.413 | .     | . | . | 1 | 1 | 1 | 1 | 1 | 1 | 1 |
| 194 | K   | 0.542 | .     | G | . | 1 | 1 | 1 | 0 | 0 | 0 | 0 |
| 195 | S   | 0.185 | A     | Q | . | 0 | 1 | 1 | 0 | 0 | 0 | 0 |
| 196 | H   | 0.786 | G     | R | G | 0 | 0 | 0 | 0 | 0 | 0 | 0 |
| 197 | P   | 0.565 | L     | G | I | 0 | 0 | 0 | 0 | 0 | 0 | 0 |
| 198 | S   | 0.297 | T     | E | . | 0 | 1 | 1 | 0 | 0 | 0 | 0 |
| 199 | S   | 0.33  | L     | G | . | 0 | 1 | 1 | 0 | 0 | 0 | 0 |
| 200 | -   | -     | -     | - | - | - | - | - | - | - | - | - |
| 201 | P   | 0.994 | Q     | Q | Q | 0 | 0 | 0 | 1 | 1 | 1 | 1 |
| 202 | Q   | 0.476 | .     | . | . | 1 | 1 | 1 | 1 | 1 | 1 | 1 |
| 203 | Q   | 0.679 | .     | . | . | 1 | 1 | 1 | 1 | 1 | 1 | 1 |
| 204 | S   | 0.466 | H     | W | . | 0 | 1 | 1 | 0 | 0 | 0 | 0 |

|                  |     |             |       |   |   |      |      |     |      |      |     |
|------------------|-----|-------------|-------|---|---|------|------|-----|------|------|-----|
| 205              | R   | 0.913       | Q     | . | M | 0    | 0    | 0   | 0    | 0    | 0   |
| 206              | R   | 1           | .     | . | . | 1    | 1    | 1   | 1    | 1    | 1   |
| 207              | L   | 0.649       | .     | F | . | 1    | 1    | 1   | 0    | 0    | 0   |
| 208              | A   | 0.903       | .     | . | . | 1    | 1    | 1   | 1    | 1    | 1   |
| 209              | K   | 0.477       | Q     | Q | N | 0    | 0    | 0   | 1    | 0    | 1   |
| 210              | L   | 0.979       | .     | . | . | 1    | 1    | 1   | 1    | 1    | 1   |
| 211              | L   | 0.993       | .     | . | . | 1    | 1    | 1   | 1    | 1    | 1   |
| 212              | M   | 0.787       | L     | L | . | 0    | 1    | 1   | 1    | 0    | 1   |
| 213              | L   | 0.831       | I     | . | . | 0    | 1    | 1   | 0    | 1    | 1   |
| 214              | L   | 0.999       | .     | . | . | 1    | 1    | 1   | 1    | 1    | 1   |
| 215              | S   | 0.602       | .     | . | . | 1    | 1    | 1   | 1    | 1    | 1   |
| 216              | H   | 0.908       | .     | . | . | 1    | 1    | 1   | 1    | 1    | 1   |
| 217              | I   | 0.769       | .     | . | V | 1    | 0    | 1   | 1    | 0    | 1   |
| 218              | R   | 1           | .     | . | . | 1    | 1    | 1   | 1    | 1    | 1   |
| 219              | Q   | 0.942       | H     | . | H | 0    | 0    | 0   | 0    | 0    | 0   |
| 220              | V   | 0.767       | M     | I | A | 0    | 0    | 0   | 0    | 0    | 0   |
| 221              | S   | 0.946       | .     | . | . | 1    | 1    | 1   | 1    | 1    | 1   |
| 222              | T   | 0.256       | N     | N | N | 0    | 0    | 0   | 1    | 1    | 1   |
| 223              | K   | 0.754       | .     | . | . | 1    | 1    | 1   | 1    | 1    | 1   |
| 16               | 224 | G           | 0.713 | . | . | 1    | 1    | 1   | 1    | 1    | 1   |
| 225              | I   | 0.662       | M     | . | M | 0    | 0    | 0   | 0    | 0    | 0   |
| 226              | E   | 0.622       | .     | . | . | 1    | 1    | 1   | 1    | 1    | 1   |
| 17               | 227 | H           | 0.999 | . | . | 1    | 1    | 1   | 1    | 1    | 1   |
| 18               | 228 | L           | 0.891 | . | F | 1    | 1    | 1   | 0    | 0    | 0   |
| 229              | Y   | 0.971       | .     | . | L | 1    | 0    | 1   | 1    | 0    | 1   |
| 230              | S   | 0.318       | .     | . | N | 1    | 0    | 1   | 1    | 0    | 1   |
| 231              | M   | 0.574       | .     | . | . | 1    | 1    | 1   | 1    | 1    | 1   |
| 232              | K   | 0.957       | .     | . | . | 1    | 1    | 1   | 1    | 1    | 1   |
| 233              | S   | 0.441       | C     | L | C | 0    | 0    | 0   | 0    | 0    | 0   |
| 234              | E   | 0.851       | K     | Q | K | 0    | 0    | 0   | 0    | 0    | 0   |
| 235              | G   | 0.701       | N     | S | N | 0    | 0    | 0   | 0    | 0    | 0   |
| 236              | -   | -           | -     | - | G | -    | -    | -   | -    | -    | -   |
| 237              | -   | -           | -     | - | - | -    | -    | -   | -    | -    | -   |
| 238              | -   | -           | -     | - | - | -    | -    | -   | -    | -    | -   |
| 239              | V   | 0.23        | .     | . | . | 1    | 1    | 1   | 1    | 1    | 1   |
| 240              | V   | 1           | .     | . | . | 1    | 1    | 1   | 1    | 1    | 1   |
| 241              | P   | 0.998       | .     | . | . | 1    | 1    | 1   | 1    | 1    | 1   |
| 242              | L   | 0.695       | .     | . | V | 1    | 0    | 1   | 1    | 0    | 1   |
| 243              | H   | 0.556       | Y     | . | Y | 0    | 0    | 0   | 0    | 0    | 0   |
| 244              | D   | 0.929       | .     | . | . | 1    | 1    | 1   | 1    | 1    | 1   |
| 245              | L   | 1           | .     | . | . | 1    | 1    | 1   | 1    | 1    | 1   |
| 246              | L   | 0.999       | .     | . | . | 1    | 1    | 1   | 1    | 1    | 1   |
| 247              | L   | 0.77        | .     | . | . | 1    | 1    | 1   | 1    | 1    | 1   |
| 248              | E   | 1           | .     | . | . | 1    | 1    | 1   | 1    | 1    | 1   |
| 249              | M   | 0.995       | .     | . | . | 1    | 1    | 1   | 1    | 1    | 1   |
| 250              | L   | 0.997       | .     | . | . | 1    | 1    | 1   | 1    | 1    | 1   |
| 251              | D   | 0.926       | .     | . | N | 1    | 0    | 1   | 1    | 0    | 1   |
| average or total |     | 0.729080717 |       |   |   | 0.59 | 0.58 | 160 | 0.61 | 0.55 | 156 |

Table S2. Reconstruction of ancestral function from data on extant receptors by parsimony.

The ligand regulation of various extant receptors was coded as follows: E, estrogen-activated; S, activation by other steroids; C, constitutive activity; R, transcriptionally inactive repressor. These states can be represented in the following matrix:

|                  |   |
|------------------|---|
| Vertebrate ERs   | E |
| Branchiostoma ER | R |
| Mollusk ERs      | C |
| Annelid ERs      | E |
| Vertebrate SRs   | E |
| Branchiostoma SR | S |

The rescaled consistency index (rci) is a measure of how parsimoniously a phylogenetic hypothesis explains the distribution of character states as due to common descent. It ranges from 0 (the least parsimonious possible history) to 1 (the most parsimonious). The rci is defined as

$$rci = ci * ri$$

where ci is the consistency index and ri the retention index. The ci is defined as  $min/s$ , where min is the minimum number of character changes on the most parsimonious phylogeny possible, and s is the actual number required on a given phylogeny. The ri is defined as  $ri = (max - s) / (max - min)$ , where max is the maximum number of steps required on the least parsimonious possible phylogeny.

The minimum number of possible changes for this character on any phylogeny is 3 (on a phylogeny that groups all Es together), and the maximum is 5 (on an unresolved phylogeny).

If AncSR1 is estrogen-activated (E), the character requires 3 changes of state – gain of constitutive activity in the mollusk ER, loss of activity to R in the Branchiostoma ER, and modification of ligand sensitivity from estrogens to 3-ketosteroids in the vertebrate SRs. This scenario is shown in Fig. 1C in the main article.

If AncSR1 is constitutive (C) on the same phylogeny, the same character requires 5 changes of state.

Comparing the two hypotheses using these metrics:

| Metric | E in AncSR1 | C in AncSR1 |
|--------|-------------|-------------|
| Steps  | 3           | 5           |
| Ci     | 1.0         | 0.6         |
| Ri     | 1.0         | 0.0         |
| Rci    | 1.0         | 0.0         |

For more information on the rci, see Farris JS (1989) The retention index and the rescaled consistency index. *Cladistics* 5:417–419.

Table S3. Accession numbers and species names for sequences used in phylogenetic analyses.

| <b>sequence name</b> | <b>species name</b>            | <b>accession number</b> |
|----------------------|--------------------------------|-------------------------|
| eelAR                | <i>Anguilla japonica</i>       | BAA75464                |
| eelER                | <i>Anguilla japonica</i>       | BAA19851                |
| eelPR                | <i>Anguilla japonica</i>       | BAA89539                |
| anolisER             | <i>Anolis carolinensis</i>     | AAC64412                |
| aplysiaER            | <i>Aplysia californica</i>     | AY327135                |
| haplochromisAR       | <i>Astatotilapia burtoni</i>   | AAD25074                |
| BfER                 | <i>Branchiostoma floridae</i>  | EU371730                |
| BfSR                 | <i>Branchiostoma floridae</i>  | EU371729                |
| capitellaER          | <i>Capitella capitata</i>      | EU497681                |
| goldfishER           | <i>Carassius auratus</i>       | AAD26921                |
| whiptailizardERa     | <i>Cnemidophorus uniparens</i> | AAB35739                |
| whiptailizardPR      | <i>Cnemidophorus uniparens</i> | AAB35740                |
| quailERb             | <i>Coturnix japonica</i>       | AAC36463                |
| CragigER             | <i>Crassostreas gigas</i>      | BAF45381                |
| crocodilePR          | <i>Crocodylus siamensi</i>     | AAB81722                |
| zebrafishSF1         | <i>Danio rerio</i>             | AAC60274                |
| fruitflyERR          | <i>Drosophila melanogaster</i> | AAF50473                |
| chickER              | <i>Gallus gallus</i>           | P06212                  |
| chickPR              | <i>Gallus gallus</i>           | P07812                  |
| chickSF1             | <i>Gallus gallus</i>           | BAA76713                |
| humanRXRb            | <i>Homo sapiens</i>            | P28702                  |
| humanAR              | <i>Homo sapiens</i>            | NP_000035               |
| humanCOUP1           | <i>Homo sapiens</i>            | NP_005645               |
| humanCOUP2           | <i>Homo sapiens</i>            | P24468                  |
| humanERa             | <i>Homo sapiens</i>            | P03372                  |
| humanERb             | <i>Homo sapiens</i>            | BAA24953                |
| humanERRa            | <i>Homo sapiens</i>            | P11474                  |
| humanERRb            | <i>Homo sapiens</i>            | NP_004443               |
| humanERRg            | <i>Homo sapiens</i>            | NP_001429               |
| humanGR              | <i>Homo sapiens</i>            | P04150                  |
| humanLRH1            | <i>Homo sapiens</i>            | AAD03155                |
| humanMR              | <i>Homo sapiens</i>            | P08235                  |
| humanPR              | <i>Homo sapiens</i>            | NP_000917               |
| humanRXRa            | <i>Homo sapiens</i>            | P19793                  |
| humanRXRg            | <i>Homo sapiens</i>            | P48443                  |
| catfishERa           | <i>Ictalurus punctatus</i>     | AAC69548                |
| skateAR              | <i>Leucoraja erinacea</i>      | Q1KXY2                  |
| skateMR              | <i>Leucoraja erinacea</i>      | Q1KXY3                  |

|               |                                |           |
|---------------|--------------------------------|-----------|
| skatePR       | <i>Leucoraja erinacea</i>      | Q1KXY1    |
| skateGR       | <i>Leucoraja erinacea</i>      | Q1KXY4    |
| MarcorER      | <i>Marisa cornuarietis</i>     | ABI97119  |
| croakerERa    | <i>Micropogonias undulatus</i> | AAG16713  |
| croakerERb    | <i>Micropogonias undulatus</i> | AAG16711  |
| croakerERg    | <i>Micropogonias undulatus</i> | AAG16712  |
| mouseAR       | <i>Mus musculus</i>            | P19091    |
| mouseSF1      | <i>Mus musculus</i>            | P33242    |
| mouseERa      | <i>Mus musculus</i>            | P19785    |
| mouseERb      | <i>Mus musculus</i>            | AAB51132  |
| mouseERR2     | <i>Mus musculus</i>            | NP_036064 |
| mouseERR3     | <i>Mus musculus</i>            | AAD48369  |
| mouseERRa     | <i>Mus musculus</i>            | AAB51250  |
| mouseLRH1     | <i>Mus musculus</i>            | P45448    |
| mousePR       | <i>Mus musculus</i>            | Q00175    |
| hagfishSR2    | <i>Myxine glutinosa</i>        | ABD46743  |
| hagfishCR     | <i>Myxine glutinosa</i>        | ABD46742  |
| hagfishER     | <i>Myxine glutinosa</i>        | EU439936  |
| NuclapER      | <i>Nucella lapillus</i>        | ABQ96884  |
| octopusER     | <i>Octopus vulgaris</i>        | Q19AB0    |
| troutARa      | <i>Oncorhynchus mykiss</i>     | BAA32784  |
| troutARB      | <i>Oncorhynchus mykiss</i>     | BAA32785  |
| troutGR       | <i>Oncorhynchus mykiss</i>     | P49843    |
| TilapiaER1    | <i>Oreochromis niloticus</i>   | AAD00245  |
| TilapiaER2    | <i>Oreochromis niloticus</i>   | AAD00246  |
| BluetilapiaER | <i>Oreochromis aureus</i>      | P50240    |
| MedakaER      | <i>Oryzias latipes</i>         | P50241    |
| sheepERb      | <i>Ovis aries</i>              | AAD10826  |
| redseabreamAR | <i>Pagrus major</i>            | BAA33451  |
| redseabreamER | <i>Pagrus major</i>            | O42132    |
| flounderGR    | <i>Paralichthys olivaceous</i> | O73673    |
| halibutGR     | <i>Paralichthys olivaceous</i> | BAA25997  |
| lampreyER     | <i>Petromyzon marinus</i>      | AAK20929  |
| lampreyGR     | <i>Petromyzon marinus</i>      | AAK20930  |
| lampreyPR     | <i>Petromyzon marinus</i>      | AAK20931  |
| PlatynereisER | <i>Platynereis dumerilii</i>   | EU482033  |
| ratERa        | <i>Rattus norvegicus</i>       | CAA43411  |
| ratERb        | <i>Rattus norvegicus</i>       | AAC52602  |
| ratMR         | <i>Rattus norvegicus</i>       | P22199    |
| salmonER      | <i>Salmo salar</i>             | P50242    |
| canaryAR      | <i>Serinus canaria</i>         | AAA17402  |

|                   |                            |          |
|-------------------|----------------------------|----------|
| gildedseabreamERa | <i>Sparus aurata</i>       | AAD31032 |
| gildedseabreamERB | <i>Sparus aurata</i>       | AAD31033 |
| squalusER         | <i>Squalus acanthias</i>   | AAK57823 |
| zebrafinchERa     | <i>Taeniopygia guttata</i> | AAB81108 |
| thaisER           | <i>Thais clavigera</i>     | BAC66480 |
| turtleSF1         | <i>Trachemys scripta</i>   | AAD01975 |
| xenopusAR         | <i>Xenopus laevis</i>      | AAC97386 |
| xenopusERa        | <i>Xenopus laevis</i>      | P81559   |
| xenopusGR         | <i>Xenopus laevis</i>      | P49844   |
| xenopusMR         | <i>Xenopus laevis</i>      | Q91573   |
| xenopusPR         | <i>Xenopus laevis</i>      | AAG42362 |
